# Supplementary material for: Effective cation-assisted chirality induction using a dibenzo-diaza-30-crown-10 with bis(zinc(ii) porphyrin) unitsElectronic supplementary information (ESI) available: synthesis of 1. See http://www.rsc.org/suppdata/cc/b4/b403684k/
Source: Royal Society of Chemistry journal article supplement (doi:10.1039/b403684k), 2004-01-01
Supplement: b403684k.doc [file b403684k.doc]

**Electronic supplementary information**

**Effective cation-assisted chirality induction using a dibenzo-diaza-30-crown-10 with bis(zinc(II) porphyrin) units**

**Yuji Kubo,* Yusuke Ishii, Toshiharu Yoshizawa and Sumio Tokita**

Department of Applied Chemistry, Faculty of Engineering, Saitama University,

255 Shimo-ohkubo, Sakura-ku, Saitama 338-8570, Japan

**Synthesis of 1**

The entitled compound **1** was synthesized according to Scheme 1; a tetraphenylporphyrin (TPP) acid chloride derivative **2**1 was allowed to react with regioselectively diamino-substituted dibenzo-diaza-30-crown-10, which was derived from the corresponding dinitro derivative **3**,2 with a small amount of NEt3 in dry CH2Cl2, giving **4** in 48% yield. The metallation using Zn(OAc)2.2H2O afforded the target **1** in 97% yield, the structure being confirmed by several spectral data: 1H NMR (400 MHz, CDCl3-CD3CN (8:2 v/v), TMS) δ 2.81 (6H, s, N-CH3), 3.22 (4H, m, -NC*H*2CH2O-), 3.47 (s, 8H, -OCH2CH2O-), 3.58-3.64 (m, 12H, -OCH2CH2O-), 3.82 (m, 4H, ArOCH2C*H*2O-), 4.13 (m, 4H, ArOC*H*2CH2O-), 6.89 (d, J=8.5 Hz, 2H, ArH), 7.09-7.12 (m, 2H, ArH), 7.43 (brs, 2H, ArH), 7.68-7.75 (m, 18H, ArH), 8.10 – 8.24 (m, 20H, ArH), 8.66 (brs. 2H, -NHCO-), 8.82-8.86 (m, 16H, PyrroleH); MALDI-TOFMS3 m/z, 2000.84 [M+H]+; Anal. Found: C, 70.67; H, 4.94; N, 8.16. Calcd. for C120H100N12Zn2.2H2O: C, 70.76; H, 5.15; N, 8.25%.

**Scheme 1**. *Reagent and conditions*: (i) 10% Pd-C, H2 (2 atm), EtOH, room temperature; (ii) a few drops of dry Et3N in dry CH2Cl2; (iii) sat. Zn(OAc)2.2H2O in MeOH, CH2Cl2, room temperature.

Reference

1. M. R. M. Domingues, M. G. O. Santana-Marques, P. Domingues, M. A. Faustino, M. G. P. M. S. Neves, J. A. S. Cavaleiro and A. J. Ferrer-Correia, *Rapid Commun. Mass Spectrom.*, 2000, **14**, 2025.
2. T. Tozawa, Y. Misawa, S. Tokita and Y. Kubo, *Tetrahedron Lett.*, 2000, **41**, 5219.
3. We appreciate Shimadzu Co. Ltd. for measuring MALDI-TOFMS spectroscopy.
